# Supplementary material
Source: ML conference proceedings conference paper supplement (https://openaccess.thecvf.com/content/CVPR_2019/html/Yuan_A_Decomposition_Algorithm_CVPR_2019_paper.html)
Supplement: Supplementary file 1 [file Yuan_A_Decomposition_Algorithm_CVPR_2019_supplemental.pdf]

# Appendix

## A. Proof of Proposition 1

**Proposition 1.** *When the cyclic order strategy is used, coordinate descent method is guaranteed to converge to a coordinate-wise minimum of Problem (10) that  $\forall i, \mathbf{y}_i^* = \arg \min_{\alpha \geq \hat{L}} \mathcal{L}(\mathbf{y}_i^* + \alpha \mathbf{e}_i)$ .*

*Proof.* Note that  $\mathcal{L}(\mathbf{y})$  is continuous and  $\{\mathcal{L}(\mathbf{y}^j)\}$  converges monotonically. Assuming that it converges to  $\mathcal{L}^*$  with  $\lim_{j \rightarrow \infty} \mathcal{L}(\mathbf{y}^j) = \mathcal{L}^*$ , we obtain that  $\forall \alpha, i = 1, \dots, m$ :

$$\mathcal{L}^* = \mathcal{L}(\mathbf{y}^{j-1}) = \mathcal{L}(\mathbf{y}^j) \leq \mathcal{L}(\mathbf{y}^{j-1} + \alpha \mathbf{e}_i). \quad (12)$$

Therefore, the right-handed side in (12) attains its minimum at both 0 and  $(\mathbf{y}^j)_i - (\mathbf{y}^{j-1})_i$ . Combining with the fact that the subproblem only contains one unique global solution, we have  $(\mathbf{y}^{j-1})_i = (\mathbf{y}^j)_i$ . Since the coordinate  $i$  is picked using cyclic order, we have:  $\mathbf{y}^{j-1} = \mathbf{y}^j = \mathbf{y}^*$  and  $\mathbf{y}^*$  is a coordinate-wise minimum point.  $\square$

## B. Proof of Lemma 2

**Lemma 2. (Sufficient Decrease Condition)** *It holds that:  $f(\mathbf{x}^{t+1}) - f(\mathbf{x}^t) \leq \frac{-\theta \|\mathbf{x}^{t+1} - \mathbf{x}^t\|_2^2}{(\mathbf{x}^{t+1})^T \mathbf{C} \mathbf{x}^{t+1}}$ .*

*Proof.* We let  $B$  be the working set in the  $t$ -th iteration and  $N \triangleq \{1, 2, \dots, n\} \setminus B$ . Since we solve Problem (3) in the  $t$ -th iteration, we have:

$$\begin{aligned} & (h(\mathbf{x}_B^{t+1}, \mathbf{x}_N^t) + \frac{\theta}{2} \|\mathbf{x}_B^{t+1} - \mathbf{x}_B^t\|_2^2) / g(\mathbf{x}_B^{t+1}, \mathbf{x}_N^t) \\ & \leq (h(\mathbf{z}, \mathbf{x}_N^t) + \frac{\theta}{2} \|\mathbf{z} - \mathbf{x}_B^t\|_2^2) / g(\mathbf{z}, \mathbf{x}_N^t), \quad \forall \mathbf{z} \in \mathbb{R}^k. \end{aligned}$$

We let  $\mathbf{z} = \mathbf{x}_B^t$  and combine with the fact that  $\mathbf{x}_N^{t+1} = \mathbf{x}_N^t$ , we have:

$$\begin{aligned} & (h(\mathbf{x}_B^{t+1}, \mathbf{x}_N^{t+1}) + \frac{\theta}{2} \|\mathbf{x}^{t+1} - \mathbf{x}^t\|_2^2) / g(\mathbf{x}_B^{t+1}, \mathbf{x}_N^{t+1}) \\ & \leq (h(\mathbf{x}_B^t, \mathbf{x}_N^t) + 0) / g(\mathbf{x}_B^t, \mathbf{x}_N^t). \end{aligned}$$

Noticing the fact that  $h(\mathbf{x}_B^t, \mathbf{x}_N^t) = \frac{1}{2} (\mathbf{x}^t)^T \mathbf{A} \mathbf{x}^t$  and  $g(\mathbf{x}_B^t, \mathbf{x}_N^t) = \frac{1}{2} (\mathbf{x}^t)^T \mathbf{C} \mathbf{x}^t$ , we have:

$$\begin{aligned} & ((\mathbf{x}^{t+1})^T \mathbf{A} \mathbf{x}^{t+1} + \theta \|\mathbf{x}^{t+1} - \mathbf{x}^t\|_2^2) / ((\mathbf{x}^{t+1})^T \mathbf{C} \mathbf{x}^{t+1}) \\ & \leq ((\mathbf{x}^t)^T \mathbf{A} \mathbf{x}^t) / ((\mathbf{x}^t)^T \mathbf{C} \mathbf{x}^t). \end{aligned}$$

Moreover, using the structure of the objective function  $f(\cdot)$ , we obtain:  $f(\mathbf{x}^{t+1}) - f(\mathbf{x}^t) = \frac{(\mathbf{x}^{t+1})^T \mathbf{A} \mathbf{x}^{t+1}}{(\mathbf{x}^{t+1})^T \mathbf{C} \mathbf{x}^{t+1}} - \frac{(\mathbf{x}^t)^T \mathbf{A} \mathbf{x}^t}{(\mathbf{x}^t)^T \mathbf{C} \mathbf{x}^t} \leq \frac{-\theta \|\mathbf{x}^{t+1} - \mathbf{x}^t\|_2^2}{(\mathbf{x}^{t+1})^T \mathbf{C} \mathbf{x}^{t+1}}$ . Thus, we finish the proof of this lemma.  $\square$

## C. Proof of Theorem 2

We now prove the convergence properties of Algorithm 1. The following supermartingale convergence result is useful in our analysis [31].

**Lemma 3. [31]** *Let  $\mathbf{v}_t, \mathbf{u}_t$  and  $\alpha_t$  be three sequences of nonnegative random variables such that*

$$\begin{aligned} \mathbb{E}[\mathbf{v}_{t+1} | \mathcal{F}_t] & \leq (1 + \alpha_t) \mathbf{v}_t - \mathbf{u}_t, \quad \forall t \geq 0 \text{ a.s.} \\ \text{and } \sum_{t=0}^{\infty} \alpha_t & < \infty \text{ a.s.}, \end{aligned} \quad (13)$$

where  $\mathcal{F}_t$  denotes the collections  $\{\mathbf{v}_0, \dots, \mathbf{v}_t, \mathbf{u}_0, \dots, \mathbf{u}_t, \alpha_0, \dots, \alpha_t\}$ . Then, we have  $\lim_{t \rightarrow \infty} \mathbf{v}_t = \chi$  for a random variable  $\chi \geq 0$  a.s. and  $\sum_{t=0}^{\infty} \mathbf{u}_t < \infty$  a.s.

We now present our main results.

**Theorem 2. Convergence Properties of Algorithm 1.** *Assume that the subproblem in (3) is solved globally, and there exists a constant  $\sigma$  such that  $\mathbf{x}^t \mathbf{C} \mathbf{x}^t \geq \sigma > 0$  for all  $t$ . We have the following results.*

(i) *When the random strategy is used to find the working set, we have  $\lim_{t \rightarrow \infty} \mathbb{E}[\|\mathbf{x}^{t+1} - \mathbf{x}^t\|] = 0$  and Algorithm 1 converges to the block- $k$  stationary point in expectation.*

(ii) *When the swapping strategy is used to find the working set with  $k \geq 2$ , we have  $\lim_{t \rightarrow \infty} \|\mathbf{x}^{t+1} - \mathbf{x}^t\| = 0$  and Algorithm 1 converges to the block-2 stationary point deterministically.*

*Proof.* We use  $\mathbf{x}^*$  and  $\bar{\mathbf{x}}$  to denote any optimal point and any block- $k$  stationary point of (1), respectively. We use the notation  $\xi^t$  for the entire history of random index selection:

$$\xi^t = \{B^0, B^1, \dots, B^t\}$$

(i) We notice that  $B^t$  is independent on the past  $B^{t-1}$ , while  $\mathbf{x}^t$  fully depends on  $\xi^{t-1}$ . Taking the expectation conditioned on  $\xi^{t-1}$  for the sufficient descent inequality in Lemma 2, we obtain:

$$\begin{aligned} & \mathbb{E}[f(\mathbf{x}^{t+1}) | \xi^t] - f(\mathbf{x}^t) \\ & \leq -\mathbb{E}\left[\frac{\theta \|\mathbf{x}^{t+1} - \mathbf{x}^t\|_2^2}{(\mathbf{x}^{t+1})^T \mathbf{C} \mathbf{x}^{t+1}} | \xi^t\right] \\ & \stackrel{(a)}{\leq} -\frac{\theta}{\sigma} \mathbb{E}[\|\mathbf{x}^{t+1} - \mathbf{x}^t\|_2^2 | \xi^t] \\ & = -\frac{\theta}{\sigma} \frac{1}{C_n^k} \sum_{i=1}^{C_n^k} \|\mathcal{P}(\mathcal{B}_{(i)}, \mathbf{x}^t) - \mathbf{x}_{\mathcal{B}_{(i)}}^t\|_2^2 \\ & \stackrel{(b)}{=} -\frac{\theta}{\sigma} \cdot \mathcal{M}(\mathbf{x}^t) \end{aligned} \quad (14)$$

step (a) uses the assumption that  $\mathbf{x}^t \mathbf{C} \mathbf{x}^t \geq \sigma > 0, \forall \mathbf{x}^t$  which clearly holds since  $\mathbf{C}$  is strictly positive and  $\mathbf{x}^t \neq \mathbf{0}$ ; step (b) uses the definition of  $\mathcal{M}(\mathbf{x}^t)$  in Definition 1. Therefore, we have:

$$\mathbb{E}[f(\mathbf{x}^{t+1}) | \xi^t] - f(\mathbf{x}^*) \leq f(\mathbf{x}^t) - f(\mathbf{x}^*) - \frac{\theta \mathcal{M}(\mathbf{x}^t)}{\sigma} \quad (15)$$

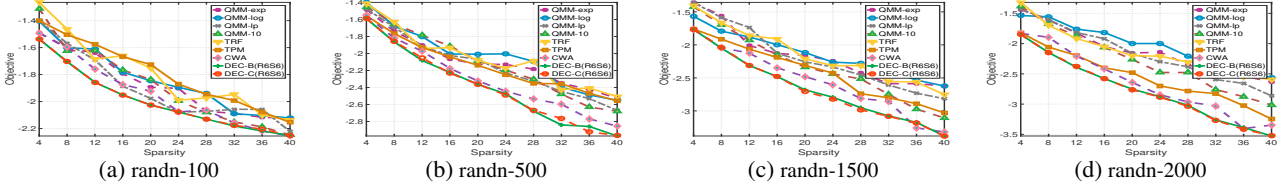

Figure 6 Accuracy of different methods on different data sets for sparse PCA problem with varying the cardinalities.

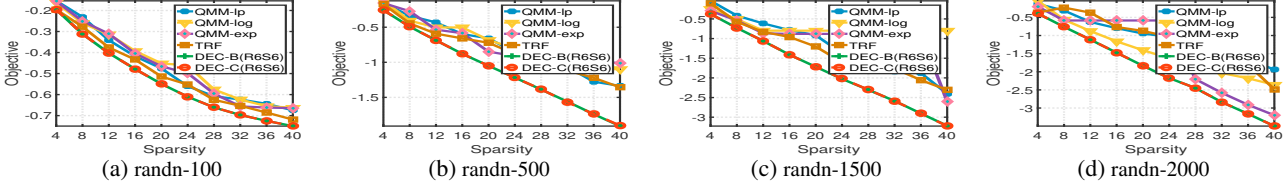

Figure 7 Accuracy of different methods on different data sets for sparse FDA problem with varying the cardinalities.

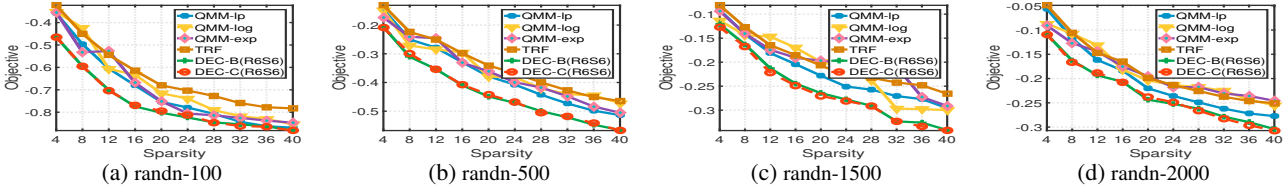

Figure 8 Accuracy of different methods on different data sets for sparse CCA problem with varying the cardinalities.

Using the supermartingale convergence theorem given in Lemma 3 with  $\mathbf{v}_t = \mathbb{E}[f(\mathbf{x}^{t+1}) | \xi^t] - f(\mathbf{x}^*) \geq 0$  and  $\mathbf{u}_t = \frac{\theta \mathcal{M}(\mathbf{x}^t)}{\sigma}$ , we have

$$\lim_{t \rightarrow \infty} f(\mathbf{x}^t) - f(\mathbf{x}^*) = \chi \text{ a.s.}$$

for a certain random variable  $\chi \geq 0$  and thus the sequence  $f(\mathbf{x}^t)$  converges to a random variable  $\bar{F} = \chi + f(\mathbf{x}^*)$ . In addition, we have  $\lim_{t \rightarrow \infty} f(\mathbf{x}^t) - f(\mathbf{x}^{t+1}) = 0$  almost surely. From (14), we have

$$\lim_{t \rightarrow \infty} \mathcal{M}(\mathbf{x}^t) = 0, \quad \lim_{t \rightarrow \infty} \|\mathbf{x}^t - \mathbf{x}^{t+1}\| = 0.$$

Therefore, the algorithm converges to the block- $k$  stationary point. Summing the inequality in (14) over  $i = 0, 1, \dots, t-1$ , we have:

$$\frac{\theta}{\sigma} \cdot \sum_{i=0}^t \mathcal{M}(\mathbf{x}^i) \leq f(\mathbf{x}^0) - f(\mathbf{x}^t).$$

Using the fact that  $f(\mathbf{x}^*) \leq f(\mathbf{x}^t)$ , we obtain:

$$\begin{aligned} \frac{\theta}{\sigma} \sum_{i=0}^t \mathbb{E}[\|\mathcal{M}(\mathbf{x}^i) | \xi^i\|] &\leq f(\mathbf{x}^0) - f(\mathbf{x}^*) \\ \Rightarrow \min_{i=1, \dots, t} \mathbb{E}[\mathcal{M}(\mathbf{x}^i) | \xi^i] &\leq \frac{\sigma(f(\mathbf{x}^0) - f(\mathbf{x}^*))}{t\theta}. \end{aligned}$$

We conclude that  $\mathbf{x}^t$  converges to the block- $k$  stationary point with  $\min_{i=1, \dots, t} \mathbb{E}[\mathcal{M}(\mathbf{x}^i) | \xi^i] \leq \mathcal{O}(1/t)$ .

(ii) We now prove the second part of this theorem. We have the following inequalities:

$$\begin{aligned} f(\mathbf{x}^{t+1}) - f(\mathbf{x}^t) &\leq -\frac{\theta \|\mathbf{x}^{t+1} - \mathbf{x}^t\|_2^2}{(\mathbf{x}^{t+1})^T \mathbf{C} \mathbf{x}^{t+1}} \\ &\leq -\frac{\theta}{\sigma} \|\mathbf{x}^{t+1} - \mathbf{x}^t\|_2^2 \end{aligned}$$

Summing this inequality over  $i = 0, 1, \dots, t-1$ , we have:

$$\begin{aligned} \frac{\theta}{\sigma} \cdot \sum_{i=0}^t \|\mathbf{x}^{i+1} - \mathbf{x}^i\|_2^2 &\leq f(\mathbf{x}^0) - f(\mathbf{x}^t) \\ \Rightarrow \min_{i=1, \dots, t} \|\mathbf{x}^{i+1} - \mathbf{x}^i\|_2^2 &\leq \frac{\sigma(f(\mathbf{x}^0) - f(\mathbf{x}^*))}{t}. \end{aligned}$$

Using the fact that  $f(\mathbf{x}^*) \leq f(\mathbf{x}^t)$ , we have  $\lim_{t \rightarrow \infty} \|\mathbf{x}^{t+1} - \mathbf{x}^t\| = 0$ . Therefore, Algorithm 1 is convergent when swapping strategy is used.

We now prove that Algorithm 1 convergence to a block-2 stationary point  $\bar{\mathbf{x}}$ . Since Algorithm 1 is monotonically non-increasing and converges to a stationary point  $\bar{\mathbf{x}}$  such that no decrease is made, we have  $\mathbf{D}_{i,j} \geq 0$  for (4). Therefore, it holds that  $\min_{\alpha} f(\bar{\mathbf{x}} + \alpha \mathbf{e}_i - (\bar{\mathbf{x}})_j \mathbf{e}_j) \geq f(\bar{\mathbf{x}})$ ,  $\forall i \in \bar{\mathcal{S}}(\bar{\mathbf{x}})$ ,  $j \in \bar{\mathcal{Z}}(\bar{\mathbf{x}})$ . We have the following result:  $f(\bar{\mathbf{x}}) \leq f(\bar{\mathbf{x}} + \mathbf{d})$ ,  $\forall \mathbf{d}$  with  $\|\mathbf{d} - \bar{\mathbf{x}}\|_0 = 2$ . Therefore,  $\bar{\mathbf{x}}$  is a block-2 stationary point.  $\square$

## D. Additional Experiments

We demonstrate the experimental results on the randomized generated data sets for sparse PCA, sparse FDA, and sparse CCA in Figure 6, 7 and 8, respectively. These results further consolidate our conclusions drawn in Section 7.
